# Supplementary material for: Building Machine Learning Predictive Models for Adolescent Internet Addiction: Key Findings on Self-Esteem and Resilience Interaction
Source: Research Square preprint supplement (doi:10.21203/rs.3.rs-5606509/v1), 2025-01-09
Supplement: Supplementary file 1 [file e837159d452999395e14982a.docx]

**Supplemental material**

**Title**: Building Machine Learning Predictive Models for Adolescent Internet Addiction: Key Findings on Self-Esteem and Resilience Interaction

**Supplemental captions:**

**Supplemental Figure 1.** ROC curves for all models in train sets.

**Supplemental Figure 2** SHAP feature dependence diagram.


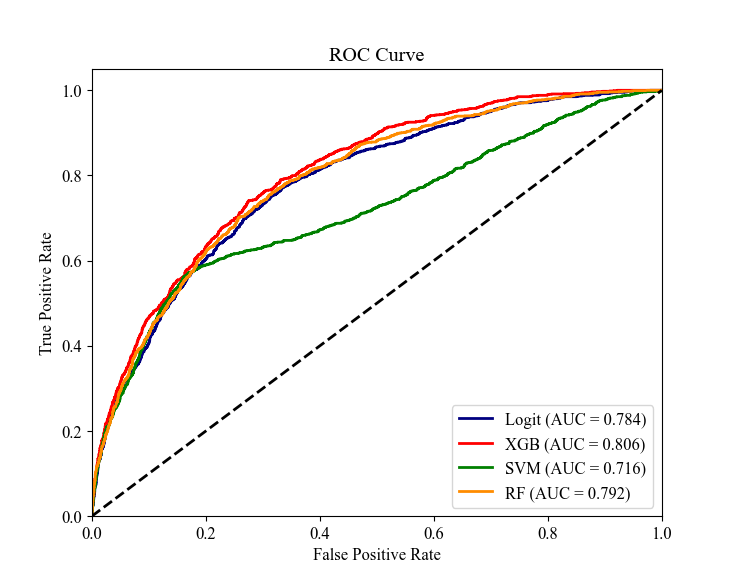
**Supplemental Figure 1.** ROC curves for all models in train set.

Notes: ROC: Receiver operating characteristic.

**Supplementary Figure2.** SHAP feature dependence diagram.


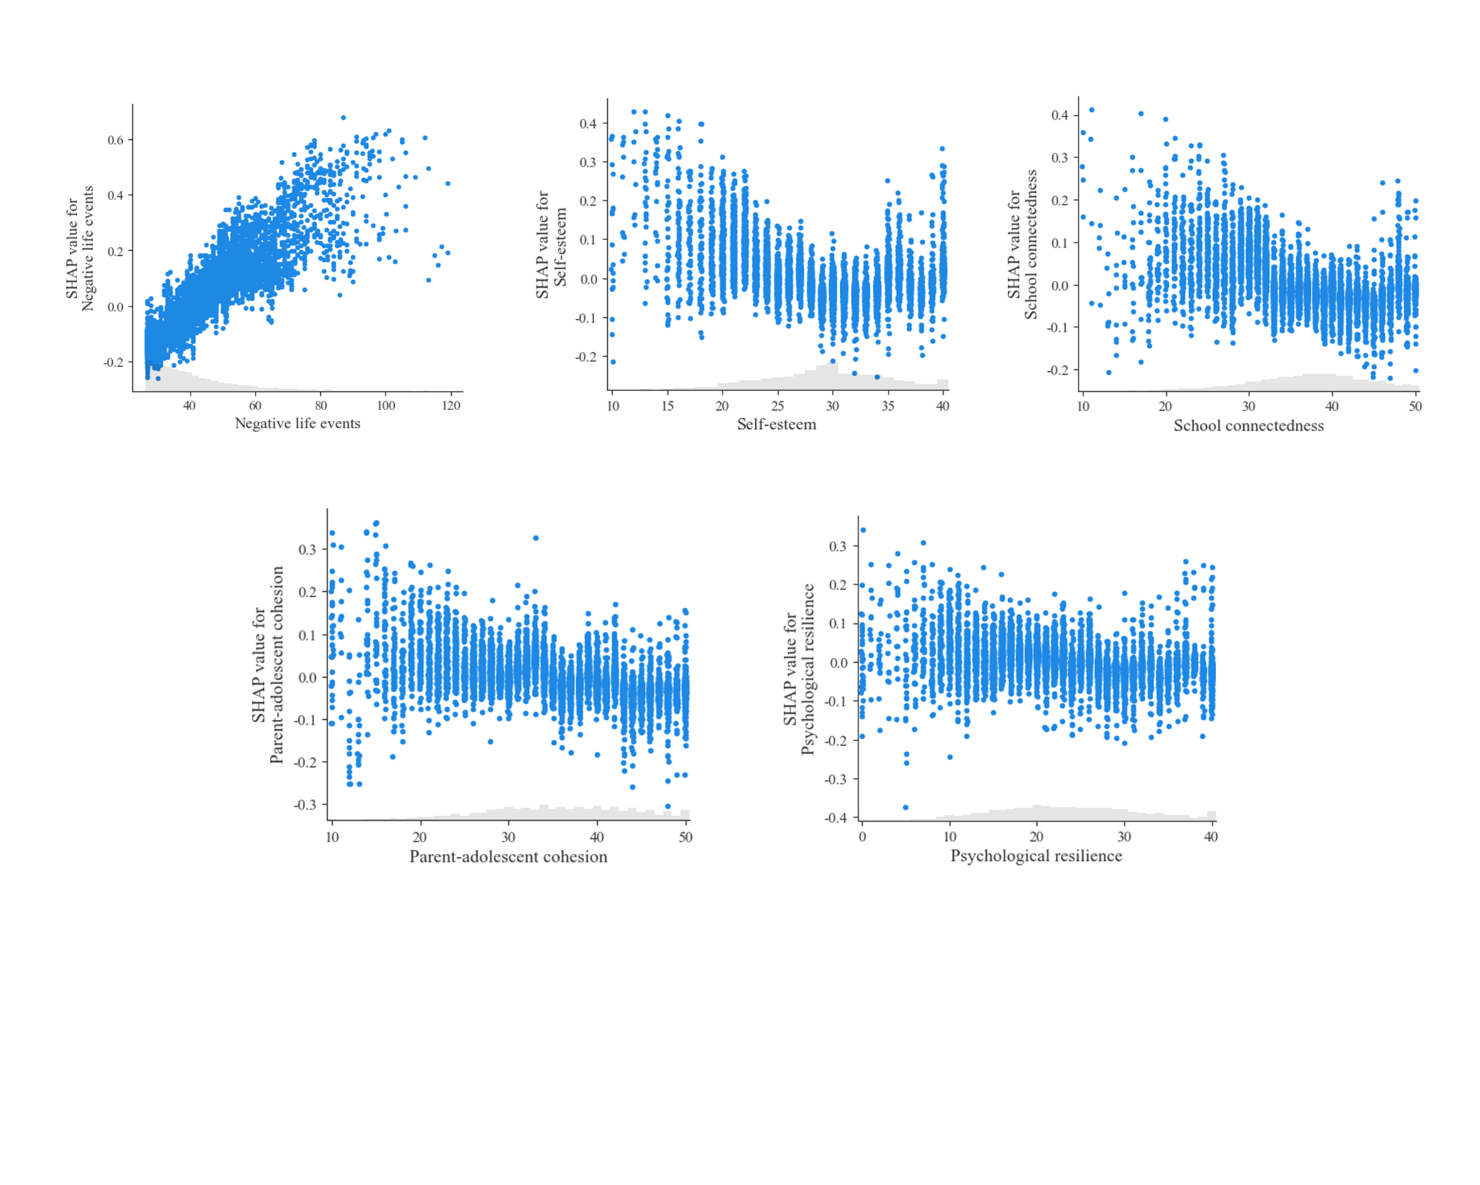
The order of the charts (top-down, left-right) follows the order of the most important variables according to SHAP.
